# Supplementary figures and images for: Photolysis of the Insensitive Explosive 1,3,5-Triamino-2,4,6-trinitrobenzene (TATB)
Source: MDPI journal article supplement (doi:10.3390/molecules27010214), 2021-12-30

SUPPLEMENTARY FIGURE

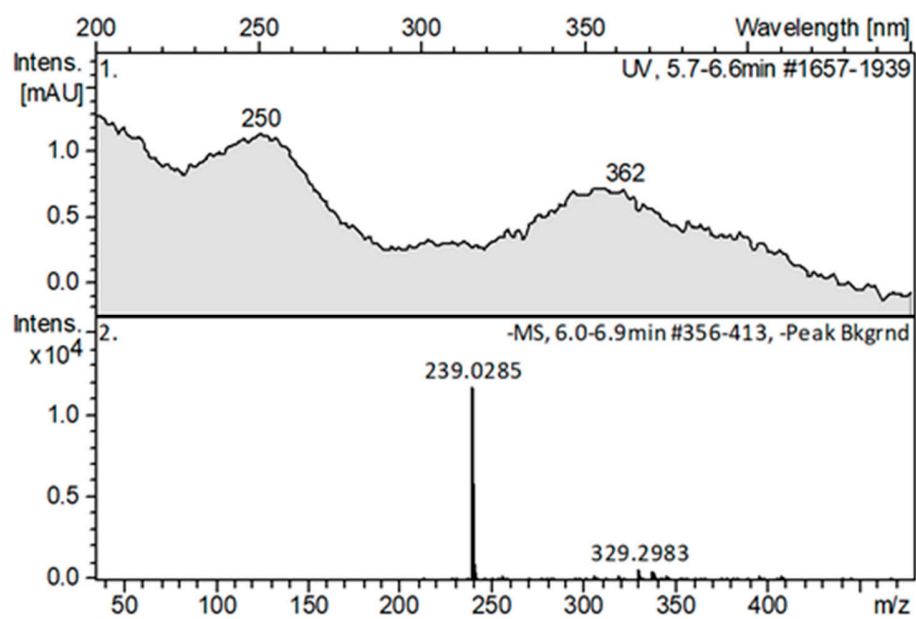

Figure S1. UV and MS spectra of compound C1

Supplement: s1 [file s1]
